# Supplementary material for: Evolution of DNA Methylation Is Linked to Genetic Aberrations in Chronic Lymphocytic Leukemia
Source: Oxford University Press journal article supplement (doi:10.1158/2159-8290.cd-13-0349), 2013-12-19
Supplement: 21598290cd130349-sup-supp_table_1.xlsx [file 21598290cd130349-sup-supp_table_1.xlsx]

## Sheet: Supplemental Table1
			#IGHV Rearrangements	Productive IGHV	Sample Clonality	IGHV Diversification	IGHV Mutation Status	ZAP70 Methylation	Estimated genomic ASM (%)	Methylation heterogeneity (%)				Min CNA 450k Clone ratio (%)	CNA clone size (%) Taqman qPCR				Min CNA qPCR Clone ratio (%)	KRAS			BRAF mutation 1			BRAF mutation 2			NOTCH			MYD88			SF3B1 mutation 1			SF3B1 mutation 2			TP53 mutation 1			TP53 mutation 2			Min mutation Clone ratio (%)	Sample genetic clone ratio (%)
Sample Name	Type	Sex									FISH	CNA deletion (450k)	CNA amplification (450k)		11q23	13q14 MDR	13q14 distal	17p13		Clone size (%)	SD	Mutation	Clone size (%)	SD	Mutation	Clone size (%)	SD	Mutation	Clone size (%)	SD	Mutation	Clone size (%)	SD	Mutation	Clone size (%)	SD	Mutation	Clone size (%)	SD	Mutation	Clone size (%)	SD	Mutation	Clone size (%)	SD	Mutation
CLL21	CLL	M	1	VH1-69	MONO	N	U	LOW	7.19585	6.19582	17p13	6p,8p,15p,17p,18p,20p	6p	94				52.7309	94.5383																						97.75	2	c.601_602insCGCG; p.L201fs*9				95.5	94
CLL23	CLL	M	1	VH1-3	MONO	A>G, (0.67/0.33)	U	HIGH	6.61074	13.1896	bidel13q14	13q		66		13	53	99.782	74																2.25	1.4095	c.1868A>G; p.Y623C				50.35	6.51952	c.704A>G; p.N235S				95.5	66
CLL30	CLL	M	2	VH1-8	MONO	N	M	HIGH	4.92773	11.7525	bidel13q14	13q		(CNA<1Mb)		3	54		92																													92
CLL31	CLL	M	2	VH3-23	MONO	N	M	HIGH	9.49515	7.85832	bidel13q14	13q		98		2			96																													96
CLL33	CLL	F	1	VH3-30	MONO	N	M	HIGH	8.76615	10.5279	del13q14	13q		78		54			92																													78
CLL34	CLL	M	1	VH1-69	MONO	N	U	LOW	6.37339	12.7759	del13q14	13q		94		49			98																													94
CLL35	CLL	M	1	VH3-15	MONO	N	M	HIGH	9.28364	9.31826	bidel13q14	13q,18p		92		1		102.75	99																						47.13	4.02717	c.716A>G; p.N239S				94.26	92
CLL40	CLL	F	2	VH3-21	MONO	G>A, (0.79/0.21)	M	HIGH	5.46542	14.597	NK	NK				98.9364			97.8728				9.68333	0.467047	c.1742A>G; p.N581S splice site																						80.6333	80.6333
CLL42	CLL	M	1	VH3-48	MONO	N	M	HIGH	6.96063	10.5966	bidel13q14	2q,13q		54		10	25		50																						1.11333	1.05983	c.716A>G; p.N239S				97.7733	50
CLL43	CLL	M	1	VH3-30	MONO	N	M	HIGH	6.24956	8.36227	NK	NK				98.5551			97.1103																													97.1103
CLL44	CLL	F	1	VH3-74	MONO	N	M	HIGH	10.4316	9.56642	del13q14	13q		(CNA<1Mb)		45.0507			90.1015																													90.1015
CLL45	CLL	M	1	VH3-15	MONO	N	M	HIGH	7.01602	10.7164	bidel13q14,+18q21,t(14;18)	13q		(CNA<1Mb)		1			98																													98
CLL47	CLL	M	1	VH1-46	MONO	N	U	LOW	2.16964	21.1275	13q,17p,6q	17p,13q,6q		52		54.5043		91.9224	83.8448																						7.48	1.20208	c.722C>G; p.S241C				62	52
CLL51	CLL	F	2	VH1-46	MONO	N	U	LOW	2.74664	19.5077	13q,11q	1p,1q,2q,6q,8p,11q,13q,18p,18q	2p	56	48	78			56				4.46333	1.6853	c.1799T>A; p.V600E																						91.0733	56
CLL60	CLL	M	1	VH1-69	MONO	N	U	LOW	6.15484	11.9528	17p13	15q,17p,18p		68				60.0275	79.9451																						96.06	2.5	c.712T>G; p.C238G				92.12	68
CLL64	CLL	M	1	VH3-23	MONO	N	U	LOW	15.5349	6.08008	13q	13q		96		53			94																43.93	3.28	c.2098A>G; p.K700E										88	88
CLL72	CLL	M	2	VH1-69	MONO	N	U	LOW	6.88617	11.4815	del13q14	13q,15q	8q	96		51			98																													96
CLL98	CLL	M	2	VH1-69	MONO	N	U	LOW	5.94301	15.615	NK	13q21,13q31		50	96				92																1.64333	1.4327	c.2098A>G; p.K700E										96.7133	50
CLL101	CLL	M	2	VH1-69	MONO	N	U	LOW	9.3	11.1283	NK	NK																																				no variants
CLL102	CLL	M	1	VH4-39	MONO	N	U	LOW	8.81627	7.90369	11q	11q		98	51				98																52.7967	4.04364	c.1996A>G; K666E										94.4067	94.4067
CLL103	CLL	M	1	VH3-15	MONO	N	U	LOW	5.53645	13.374	13q,11q	4p,11q,13q	21q	58	51	79			58																48.8	2.5	c.2098A>G; p.K700E										97.6	58
CLL104	CLL	M	2	VH3-23	MONO	N	M	LOW	7.62697	13.1372	17p	17p	11p	54				56.9346	86.1308													48.1333	4.47084	c.794T>C; p.L265P							8.39333	2.51606	c.424delC; p.P142fs*28				83.2133	54
CLL105	CLL	F	1	VH3-21	MONO	N	M	LOW	5.5507	18.3589	13q	13q,15q,17p	21q	62		51		88.8029	77.6059										9.54667	4.11077	c.7544_7545delCT; p.P2515fs*4				39.94	2.5	c.1873C>T; R625C	7.35333	0.25697	c.2098A>G; p.K700E	74.555	0.629325	c.469G>T; p.V157F	6.52667	0.932541	c.743G>A; p.R248Q	50.89	50.89
CLL106	CLL	F	1	VH1-69	MONO	N	U	LOW	5.79611	14.0042	11q,13q	13q,11q		88	48	61			78																50.36	2.5	c.2098A>G; p.K700E										99.28	78
CLL107	CLL	F	1	VH4-39	MONO	N	U	HIGH	4.36897	18.5047	12+	3p	12	52															58.02	1.71485	c.7544_7545delCT; p.P2515fs*4																83.96	52
CLL108	CLL	M	1	VH1-69	MONO	N	U	LOW	4.78091	19.1431	11q,+8q	11q	8q	68	61				78										52.1967	9.05619	c.7544_7545delCT; p.P2515fs*4							1.41	1.99404	c.2098A>G; p.K700E	1.76	1.66877	c.808T>C; p.F270L				95.6067	68
CLL109	CLL	F	1	VH3-66	MONO	N	U	HIGH	5.16749	18.3668	13q	13q		70		63			74										7.905	2.58959	c.7544_7545delCT; p.P2515fs*4				27.895	1.42673	c.1873C>T; R625C	9.8725	2.57945	c.1874G>A; R625H							55.79	55.79
CLL110	CLL	F	1	VH4-b	MONO	N	M	HIGH	9.32636	10.3559	NK	NK																							47.84	2.5	c.2110A>T; p.I704F										95.68	95.68
CLL111	CLL	F	1	VH4-31	MONO	N	U	LOW	8.7392	12.5378	NK	NK				96			92										5.125	0.00707107	c.7544_7545delCT; p.P2515fs*4																89.75	89.75
CLL112	CLL	F	1	VH3-30	MONO	N	U	LOW	2.10759	24.245	13q,17p	3p,3p,6p,6q,8p,8q,9p,10q,13q,15q,17p	2p,16p,16q	52		84		77.539	55.078																						57.0333	1.68749	c.581T>A; p.L194H	33.9167	1.82541	c.811G>A; p.E271K	67.8333	52
CLL113	CLL	M	2	VH3-11	MONO	N	U	HIGH	3.87481	14.1795	13q,11q	1q,11q,13q	4p	98	54	49			92																													92
CLL114	CLL	M	4	VH1-69;4-34	BI	N	VH1=U;VH4=U	LOW	2.69819	23.3059	13q,17p	5p,8p,13q,17p	2p,3q,13q,15q	52		62		53.561	76																39.7333	7.37248	c.1865A>G; p.E622G				73.93	3.26956	c.733G>A; p.GM245,6SV				52.14	52
CLL115	CLL	M	1	VH4-34	MONO	N	M	HIGH	4.70512	20.8678	ND	13q		(CNA<1Mb)		10		76.8656	53.7312																						16.19	3.06168	c.892G>T; p.E298*				67.62	53.7312
CLL116	CLL	F	2	VH1-2	MONO	T>C, (0.50/0.50)	U	LOW	2.38927	26.5853	ND	17p	12	66				50.4599	99.0801																						46.6633	0.369098	c.581T>G; p.L194R	34.53	4.6087	c.832C>T; P278S	69.06	66
CLL117	CLL	M	2	VH1-18	MONO	N	U	LOW	4.71775	15.3606	ND	14q	12	60															57.33	0.825409	c.7544_7545delCT; p.P2515fs*4																85.34	60
CLL118	CLL	M	2	VH1-69	MONO	N	U	LOW	8.21256	11.1008	NK	NK			95				90																						1.15667	2.00341	c.615T>A; p.205*				97.6867	90
CLL119	CLL	F	1	VH3-23	MONO	N	M	LOW	5.71282	18.0004	bidel13q,11q	13q,11q		60	78	12			56																						6.352	1.13021	c.517G>A; p.V173M	1.06	1.523	c.671A>G; p.E22G	87.296	56
CLL120	CLL	F	3	VH4-34,3-09	BI	N	VH4=M;VH3=M	HIGH	4.51295	22.9475	bidel13q	13q		64		3		95.4131	90.8262										1.27333	1.60777	c.7544_7545delCT; p.P2515fs*4										48.6733	2.57555	c.389T>C; L130P	1.67667	1.45741	c.701A>G; p.Y234C	96.6467	64
CLL121	CLL	M	1	VH1-69	MONO	N	U	LOW	6.4844	10.7731	13q,11q,17p	8p,11q,13q,17p,18p,20p	2p	52	47	45		55.843	88.314																						57.2467	3.83543	c.600T>G; p.N200K	58.3967	4.2434	c.623A>G; p.D208G	83.2067	52
CLL122	CLL	M	1	VH3-23	MONO	N	M	HIGH	3.04268	23.3036	6q,11q,+8q	4p,11q	21q,8q	66	79				58																9.88333	2.41001	c.1974G>T; p.W658C	37.2267	2.69637	c.2098A>G; p.K700E							74.4533	58
Serial Samples:																																																	Max ΔClone ratio (%)
CLL32_2007	CLL	M	2	VH3-23	MONO	N	M	HIGH	5.15634	13.1689	bidel13q14	13q		62		23			54																													54	10
CLL32_2011	CLL	M	2	VH3-23	MONO	N	M	HIGH	6.00851	12.2021	bidel13q14	13q		84		17.0853			65.8295																													65.8295
CLL36_2002	CLL	M	4	VH1-46;VH3-48	BI	N	VH1=U, VH3=U	LOW	2.43189	21.2419	13q,6q	6q,13q		72		68.7292		108.334	62.5416																4.81	0.268701	c.2223G>C; p.K741N splice site										90.38	62.5416	28
CLL36_2011	CLL	M	4	VH1-46;VH3-48	BI	N	VH1=U, VH3=U	LOW	2.16413	23.7946	13q,6q	6q,13q		52		49.9833		99.614	99.2279																						4.045	0.275772	c.722C>G; p.S241C	19	3.43654	c.730G>A; p.G244C	91.91	52
CLL48_2010	CLL	M	1	VH3-23	MONO	N	M	HIGH	9.4464	9.16919	13q,17p,+12	13q,17p	12	94		54		44.1902	88.3805													49.244	4.85277	c.794T>C; p.L265P													98.488	88.3805	14
CLL48_2012	CLL	M	1	VH3-23	MONO	N	M	HIGH	8.22912	9.01824	13q,17p,+12	13q,17p	12	90		49		52.856	94.2881													51.97	2.5	c.794T>C; p.L265P													96.06	90
CLL62_2002	CLL	F	1	VH3-7	MONO	N	M	HIGH	8.56687	12.2223	NK	NK				103																																no variants	26
CLL62_2012	CLL	F	1	VH3-7	MONO	N	M	HIGH	8.37581	12.0629	del13q14	13q		(CNA<1Mb)		87			74																													74
CLL63_2008	CLL	F	2	VH3-74	MONO	N	U	LOW	6.0955	15.6353	11q22.3,14q32,+12p11	11q,14q	12	78	58	100			84																													78	36
CLL63_2012	CLL	F	2	VH3-74	MONO	N	U	LOW	7.96023	11.0096	11q22.3,14q32,+12p11	11q,14q	12	94	48	95			90																													90
CLL65_2010	CLL	F	1	VH3-23	MONO	N	M	HIGH	11.4291	7.76321	13q	13q		92		49			90																													90	10
CLL65_2012	CLL	F	1	VH3-23	MONO	N	M	HIGH	11.3688	7.7945	13q	13q		90		52			98																													90
CLL73_2010	CLL	M	1	VH3-7	MONO	N	M	HIGH	7.69856	10.9708	NK	NK																	7.88667	0.17673	c.7544_7545delCT; p.P2515fs*4																84.2267	84.2267	14
CLL73_2012	CLL	M	1	VH3-7	MONO	N	M	HIGH	6.91524	11.0581	NK	NK																	14.45	2.5	c.7544_7545delCT; p.P2515fs*4																71.1	71.1
CLL79_2010	CLL	F	1	VH1-69	MONO	N	U	LOW	7.15571	11.5511	13q	13q,17p		94	100	50		88.4102	76.8205																53.36	1.01823	c.1996A>G; K666E				7.04	0.622254	c.818G>A; p.R273H				85.92	76.8205	100
CLL79_2011	CLL	F	1	VH1-69	MONO	N	U	LOW	5.5566	20.0031	ND	11q(3x),17p,1q,4p,5p(2x),9p,10p(2x)	5p,11q(2x)	98	98	107		47.1831	94.3663				1.35		c.1408A>G; p.T470A										48.41	2.5	c.1996A>G; K666E				48.4	5.89727	c.818G>A; p.R273H				96.8	94.3663
CLL80_2010	CLL	M	1	VH1-69	MONO	N	U	LOW	2.59146	17.6362	bidel13q	13q		74		12			76																8.75333	0.876432	c.2219G>A; p.G740E				6.98	0.998749	c.569C>T; p.P190L	12.9233	1.37326	c.817C>T; p.R273C	74.1533	74	32
CLL80_2011	CLL	M	1	VH1-69	MONO	N	U	LOW	3.92539	13.7401	bidel13q	13q		70	100				100																20.71	6.94726	c.2219G>A; p.G740E				23.99	3.6	c.569C>T; p.P190L	11.4533	1.09043	c.817C>T; p.R273C	52.02	52.02
CLL81_2010	CLL	F	1	VH3-30	MONO	N	U	LOW	8.54775	12.9035	17p	13q,17p,4p,3q(3x),9p,9q		76		1.05487		59.449	81.102																						95.15	3.6911	c.824G>C; p.C275S				90.3	76	70
CLL81_2012	CLL	F	1	VH3-30	MONO	N	U	LOW	7.73289	15.0222	17p	13q,17p,4p,3q(3x),9p,9q,1p(2x),19p		58		0.524637			98.9507																						91.67	2.5	c.824G>C; p.C275S				83.34	58
CLL82_2003	CLL	M	1	VH3-12	MONO	N	M	HIGH	8.59671	8.61465	13q	13q		94		4.49715			91.0057																													91.0057	10
CLL82_2004	CLL	M	1	VH3-12	MONO	N	M	HIGH	7.33928	10.8273	13q	13q		98		3			94																													94
CLL83_2010	CLL	F	1	VH3-21	MONO	N	U	LOW	4.75132	20.0805	13q,11q,6q	11q,6q	2p	50	64	88			72																37.0867	4.43082	c.2098A>G; p.K700E										74.1733	50	12
CLL83_2012	CLL	F	1	VH3-21	MONO	N	U	LOW	5.26172	18.0355	13q,11q,6q	11q,6q	2p	78	58	94			84																38.9367	1.49474	c.2098A>G; p.K700E										77.8733	77.8733
CLL84_2004	CLL	M	2	VH4-b	MONO	N	U	LOW	5.4884	14.0067	13q	13q14		50		66			68																													50	30
CLL84_2008	CLL	M	2	VH4-b	MONO	N	U	LOW	3.1153	17.7447	13q	13q14,13q31-33		52		64			72																													52
CLL85_2003	CLL	M	2	VH4-30	MONO	N	M	HIGH	6.76258	11.387	NK	13q31,13q21		64		88		104.33	76													46.65	3	c.794T>C; p.L265P													93.3	64	14
CLL85_2009	CLL	M	2	VH4-30	MONO	N	M	HIGH	5.46216	15.17	NK	13q14,13q21		68		81		94.3727	62													49.77	2	c.794T>C; p.L265P													99.54	62
CLL86_2006	CLL	F	1	VH7-4-1	MONO	N	U	HIGH	7.47708	9.70943	11q	11q		98	48	83		96.7166	66																													66	30
CLL86_2011	CLL	F	1	VH7-4-1	MONO	N	U	HIGH	6.64616	13.1893	11q	11q		96	49	98			96																													96
CLL87_2007	CLL	NA	1	VH3-23	MONO	N	U	LOW	5.16751	15.2019	13q	13q	21q	92		55			90																46.9067	5.39868	c.2098A>G; p.K700E				6.20333	2.04784	c.742C>T; p.R248W				87.5933	87.5933	8
CLL87_2009	CLL	NA	1	VH3-23	MONO	N	U	LOW	5.92945	13.6079	13q	13q	21q	94		51			98																45.91	2.54112	c.2098A>G; p.K700E				2.89	1.20403	c.742C>T; p.R248W				91.82	91.82
CLL88_2009	CLL	M	2	VH1-69	MONO	N	U	LOW	7.0489	8.85633	12+		12	76		99			98													46.65	2.5	c.794T>C; p.L265P													93.3	76	24
CLL88_2010	CLL	M	2	VH1-69	MONO	N	U	LOW	6.23224	10.9528	12+	13q	12	80		88			76													49.77	2	c.794T>C; p.L265P													99.54	76
CLL89_2010	CLL	M	1	VH3-13	MONO	N	U	LOW	9.51198	8.07837	13q,11q	11q,13q		94	51	53			94				45.38	3.5	c.1799T>A; p.V600E																						90.76	90.76	4
CLL89_2011	CLL	M	1	VH3-13	MONO	N	U	LOW	7.91915	7.41486	13q,11q	11q,13q		98	50	54			92				47.99	2.5	c.1799T>A; p.V600E																						95.98	92
CLL90_2003	CLL	F	1	VH1-18	MONO	N	M	HIGH	8.78373	11.9412	13q	13q		(CNA<1Mb)		41			82																													82	32
CLL90_2009	CLL	F	1	VH1-18	MONO	N	M	HIGH	9.25377	11.9069	13q	13q		(CNA<1Mb)		25			50																													50
CLL91_2002	CLL	M	1	VH3-21	MONO	N	M	HIGH	5.98451	11.3544	13q,11q	11q,13q		94	50	3	46		92																													92	2
CLL91_2008	CLL	M	1	VH3-21	MONO	N	M	HIGH	5.22086	11.7887	13q,11q	11q,13q		96	51	4	47		92																													92
CLL92_2003	CLL	M	1	VH1-69	MONO	N	U	LOW	7.66501	9.5476	13q	13q		(CNA<1Mb)		47	98		94										45.8667	3.70446	c.7544_7545delCT; p.P2515fs*4				45.7567	2.27931	c.1868A>G; p.Y623C										91.5133	91.5133	18
CLL92_2007	CLL	M	1	VH1-69	MONO	N	U	LOW	7.0404	10.6097	13q	13q		(CNA<1Mb)		47	99		94										48.81	3.81016	c.7544_7545delCT; p.P2515fs*4				43.5967	0.686464	c.1868A>G; p.Y623C										87.1933	87.1933
CLL93_2004	CLL	F	1	VH4-39	MONO	C>T, (0.85/0.15)	U	HIGH	4.93462	18.9873	NK	NK											15.7533	2.30079	c.1406G>C; p.G469A	27.9733	1.21509	c.1799T>A; p.V600E																			55.9467	55.9467	28
CLL93_2005	CLL	F	1	VH4-39	MONO	C>T, (0.62/0.38)	U	HIGH	3.12954	23.122	NK	6q		54									24.21		c.1406G>C; p.G469A	15.76		c.1799T>A; p.V600E																			51.58	51.58
CLL94_2010	CLL	F	1	VH1-69	MONO	N	U	LOW	5.99476	16.7688	NK	NK			88				76	10.0567	0.839663	c.64C>A; p.Q22K	4.9	2.36417	c.1799T>A; p.V600E																						79.8867	76	74
CLL94_2011	CLL	F	1	VH1-69	MONO	N	U	LOW	8.51553	10.6273	11q	11q,15q,14q		94	57				86	1.175	0.586899	c.64C>A; p.Q22K	42.0233	2.02219	c.1799T>A; p.V600E																						84.0467	84.0467
CLL95_2004	CLL	M	1	VH3-11	MONO	N	U	LOW	5.25144	14.6009	13q	13q,		88		51			98																15.46	1.09192	c.1866G>T; p.E622D				4.8	1.78401	c.639delA; p.H214fs*33				69.08	69.08	30
CLL95_2005	CLL	M	1	VH3-11	MONO	N	U	LOW	7.68577	10.5339	13q	13q,		94		50.2982			99.4035																1.02333	0.707413	c.1866G>T; p.E622D				2.77333	2.005	c.639delA; p.H214fs*33				94.4533	94
CLL96_2002	CLL	M	3	VH4-34,3-30	BI	N	VH4=M;VH3=U	HIGH	3.93495	19.1607	13q	13q,		96		59			82																													82	8
CLL96_2005	CLL	M	1	VH4-34	MONO	N	M	HIGH	3.90186	18.44	13q	13q,		90		63			74																													74
CLL97_2005	CLL	F	1	VH3-33	MONO	N	U	LOW	8.227	11.5233	NK	NK																							1.18333	2.04959	c.2098A>G; p.K700E										97.6333	97.6333	15
CLL97_2010	CLL	F	1	VH3-33	MONO	N	U	LOW	5.21345	15.9999	t14q32	NK																							0.0866667	0.150111	c.2098A>G; p.K700E										99.8267	70
CLL99_2010	CLL	M	1	VH7-4	MONO	N	U	LOW	4.45465	19.0858	13q,17p	13q		76		78.1369			56.2739										44.38	7.5475	c.7544_7545delCT; p.P2515fs*4										24.05	4.0765	c.617T>A; p.L206*	25.785	4.31837	c.695_719del25; p.I232fs*6	51.57	51.57	6
CLL99_2011	CLL	M	1	VH7-4	MONO	N	U	LOW	4.42755	18.7726	13q,17p	13q		68		77.0717			54.1434										50.45	1.28693	c.7544_7545delCT; p.P2515fs*4										29.39	0.678823	c.617T>A; p.L206*	23.03	3.11127	c.695_719del25; p.I232fs*6	53.94	53.94
CLL100_2010	CLL	F	1	VH3-7	MONO	N	M	HIGH	10.0631	9.30816	17p	17p,8p		58				56.8907	86.2185																						59.0114	4.34271	c.584T>C; p.I195T	4.57143	2.15855	c.742C>T; p.R248W	81.9771	58	10
CLL100_2011	CLL	F	1	VH3-7	MONO	N	M	HIGH	8.97986	9.05571	17p	17p,8p		60																											64.96	4.28729	c.584T>C; p.I195T	3.0275	2.3941	c.742C>T; p.R248W	70.08	60
Healthy Donor Samples:
HB45	B cells LN								0.631612	20.8076
HB48	B cells LN								0.875709	21.8504
HB15	B cells LN	F							0.871008	20.9119
HB18	B cells LN	F							0.926913	17.8388
HB3	B cells PB	M							0.775123	14.2131
HB7	B cells PB	M							0.815152	15.4259
HB8	B cells LN	F							0.678546	18.4085
HT1	T cells PB								0.907455	23.353
HT17	T cells PB								0.544966	19.0287
HT2	T cells PB								0.91052	20.1666
HT3	T cells PB	F							0.641401	18.5801
											NK = normal karyotype
											ND = not done
[truncated: 2 more columns]
