# Supplementary material for: Evolution of DNA Methylation Is Linked to Genetic Aberrations in Chronic Lymphocytic Leukemia
Source: Oxford University Press journal article supplement (doi:10.1158/2159-8290.cd-13-0349), 2013-12-19
Supplement: 21598290cd130349-sup-supp_table_2.xlsx [file 21598290cd130349-sup-supp_table_2.xlsx]

## Sheet: Sheet1
SNP1	SNP2	SNP3	SNP4	SNP5	SNP6	SNP7	SNP8	Left Primer	Right Primer	Length	CpGs	GENE	450k Probes covered by amplicon
rs1042149	rs3132555	rs3095298	rs117140603	rs3094220	rs9263641	rs1042145	rs3094219	TTTTGTGGGAGTAGTTGGAAGG	CAATAACCACTTTTCACTAACCTTTCT	453	6	PSORS1C1	cg05545351
rs1061783								GTAGGTTATTGGGGTGGGGTAG	CAAAAACTTCAATATACCCATCAAAA	248	5	ZBTB22	cg08573355	cg07969781	cg25356697
rs11635997	rs16973398							TAGAATGTGGGGGTTGAAGAGT	CTCCTCCCTCAATACTCCCTTC	401	18	SCG5	cg13492803	cg15744134	cg08478116	cg12134633
rs11767903	rs11771048	rs11767867						GGGTTTGGTTTATGGGTTGTTA	TAACAAATTCCACCCCACTACC	206	8	INTERGENIC	cg01580578
rs2239713								GGGAGGATTTTGGAGGAG	TCAAACAAACTAAATACAAATTTTATCAC	378	19	FAM50B	cg18872973	cg21177626	(inclusive)
rs2251375								TGTATATGGTTGGGGGTTAGTTG	AACCCTCACCAAAAACCAAAAT	479	32	H19	cg09701145	cg01539474	(inclusive)
rs2256879								GGGAGAGGTAGAGGTTTTATATTTG	CAACCTCTATTCCAATCACTTCTC	262	7	ZACN	cg26545162	cg03882612	cg14651919	cg18010718
rs2288932								GAAGGTTTTGGAGAAGGGAAA	AAACACCTACCCTAAAACCAACTC	418	14	HDGFRP2	cg08312149	cg24084706	cg25429312	cg19612770	cg05350360
rs2307019	rs2307018							GGGTAGGGTTGGTTTTGTTTTA	TCCATAATCTACACCCCACTCC	357	11	RASIP1	cg05432996	cg10347828
rs2730351	rs115505651							GGGATAGTGGTTTTTAGGAAGG	TAATAAATTCTCAATCAAACAAAACTAAC	419	8	GALNT15	cg23067317	cg18789887	cg13606421	cg10453019
rs2972011	rs114712651							GTAGAGTTGGGTTGGGAGTGTT	ACCCTATCCACACACATACACC	277	6	HERC3	cg07539802	cg05898246	cg26406256	cg07189342
rs365605	rs11824077							GGGTTTTGGTTTATTTGGGTTT	CAACTCTAAAACTAACCTCCTCTCATT	379	6	SLC22A18AS	cg02462487	cg16129800	cg21599100	cg05752118	cg11785933
rs3795148	rs76589372							GTTTGGTTTAGGGATTAATTGG	AAAAACCCAAACCTCACAATAC	470	9	BLCAP	cg20601276	cg07360805	(inclusive)
rs4081847	rs4081846							ATTGTTTTGGGAGGGAGTTGT	CTCACCAACAACAACAAAAACC	366	13	INTERGENIC	cg09672025	cg09716807	cg03992168
rs4301800	rs55752358							TTTGGAGGTAGTGAGGAAAGGA	AAATATTCCAATATCCCAAAACTCC	259	5	ABCG4	cg03904291	cg03222066	cg22138302
rs4491829								AAGGAGGGAGAGGGGGTATT	CCAACCCCCAAAAAAATCTC	212	4	TBC1D22A	cg13554549
rs4838721								GGTTAGGGGAATTAAGAGGTAAGTG	CCACTACAACTCCCTAAACACTCTC	276	5	PRAP1	cg03743584	cg15549126
rs4841	rs13183077							TGGATTGAATTTTATGAGGGTAGA	CCACATCCTAAACAACCAACA	233	4	RPS14	cg06678902
rs4903301	rs4903302	rs11159131	rs77060667					GAGGTATTTTATAATTTTTGTGGGATT	CACTAACAAAACCAATTTCCCATA	461	5	FOS	cg23264565
rs6019062								AAGTTTATTTTGGGGATGGATG	CCCAAACATATTCCAACCACTT	398	19	BLCAP	cg22943498	cg04810287	(inclusive)
rs7029319	rs112102612							GAAGTGGGTATTTTGGGGTTT	CCCCTCCAACAAAAAAACAA	250	9	INTERGENIC	cg21177396
rs7202595	rs112592246	rs67566764						TTTGGATAAGTGTTTTATAGAAATGTGA	CTAACACCCAAACATCCCAAAT	207	8	ZFHX3	cg10104480	cg05918327
rs729778								GGGTTTTTGTTTTAGGTTATTAGG	CAAAAACCAACCACACAATATTAC	296	7	RECQL5	cg19468528
rs743401	rs2239524	rs72856718						GGAGGGTGGGAGGAAGATT	TCATACTTTCAAAATTCTAAACAATACC	462	6	CCHCR1	cg12044213	cg20635071
rs7796547	rs7805774							TGTTTGTTTGTTGGTTATGTGG	AAAAACAAACTCTAAAACTACAACCT	649	20	MAD1L1	cg12492273	cg01119831
rs8019270	rs113382659							GGTTTTGATTTTGGGATAGTGG	ATCTACAAACCCAAACCCTTCC	410	28	TBPL2	cg23573665	cg04380297	(inclusive)
rs887651	rs10819170							TTTGGGTGTAGGTTTTATGTTGTG	AATTAAACCCTCCCTCATCTTTC	307	14	MVB12B	cg14365300
rs9605084	rs638152	rs12485013	rs638150	rs56254303				GGGGGTTTTAGGATTTGTTAGG	TTCAACTCCTACCTCTCAACCTC	329	16	LOC284865	cg05389174	cg12743638
